# Supplementary material for: MiR-324-3p promotes tumor growth through targeting DACT1 and activation of Wnt/β-catenin pathway in hepatocellular carcinoma
Source: PubMed Central journal article supplement (PMC5630364; doi:10.18632/oncotarget.20058), 2017-08-07
Supplement: oncotarget-08-65687-s001.pdf [file oncotarget-08-65687-s001.pdf]

# MiR-324-3p promotes tumor growth through targeting DACT1 and activation of Wnt/ $\beta$ -catenin pathway in hepatocellular carcinoma

## SUPPLEMENTARY MATERIALS

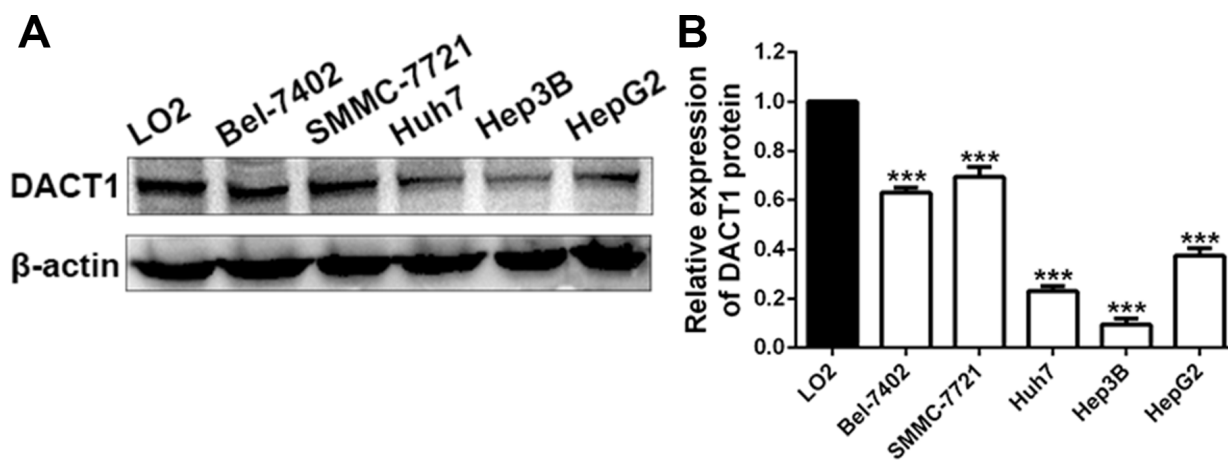

**Supplementary Figure 1: DACT1 is frequently downregulated in HCC cell lines.** Western blot analysis revealed that the expression of DACT1 protein in five HCC cell lines was significantly decreased compared to LO2 cells.  $n =$  three repeats with similar results, \*\*\* $P < 0.001$  by ANOVA.
